# Supplementary material for: Estimation of soil salt content by combining UAV-borne multispectral sensor and machine learning algorithms
Source: PeerJ. 2020 Apr 28;8:e9087. doi: 10.7717/peerj.9087 (PMC7194094; doi:10.7717/peerj.9087)
Supplement: Supplemental Information 1 [file peerj-08-9087-s001.xlsx]

## Sheet: Sheet1
B1	B2	B3	B4	B5	B6	NDSI-1	NDSI-2	S1	S2	S3	S4	S5	S6-1	S6-2	SR-1	SR-2	BI-1	BI-2	DI2-1	DI3-1	DI4-1	DI5-1	DI6-1	DI3-2	DI4-2	DI5-2	DI6-2	DI4-3	DI5-3	DI6-3	DI5-4	DI6-4	DI6-5
0.757487	0.953902	0.751522	0.964379	0.90388	0.795979	-0.0920371	1.50304	1.00794	0.00395325	0.946389	0.754499	0.596779	0.712113	0.627104	1.20273	1.05916	1.90933	1.43608	0.196414	-0.00596549	0.206892	0.146393	0.0384914	-0.20238	0.0104776	-0.0500214	-0.157923	0.212857	0.152358	0.0444569	-0.0604989	-0.1684	-0.107902
0.659555	0.490384	0.660337	0.830598	0.650708	0.694482	0.00734437	1.32067	0.998816	-0.000592321	0.490966	0.659946	0.888138	0.876224	0.935169	0.985418	1.05171	0.738683	1.0964	-0.169171	0.0007818	0.171043	-0.008847	0.0349271	0.169953	0.340214	0.160324	0.204098	0.170261	-0.0096288	0.0341453	-0.17989	-0.136116	0.0437741
0.5173	0.454862	0.621181	0.938484	0.723102	0.734742	-0.0758178	1.24236	0.832768	-0.0912454	0.546204	0.566866	0.70645	0.987503	1.0034	1.16408	1.18281	0.825813	1.22021	-0.0624383	0.103881	0.421184	0.205802	0.217442	0.166319	0.483622	0.26824	0.27988	0.317303	0.101921	0.113561	-0.215382	-0.203742	0.0116403
0.599986	0.728644	0.607622	0.844356	0.900194	0.728843	-0.194037	1.21524	0.987433	-0.00632342	0.737918	0.603792	0.500333	0.750679	0.607788	1.4815	1.1995	1.39135	1.20121	0.128658	0.00763621	0.24437	0.300208	0.128857	-0.121022	0.115712	0.17155	0.000198832	0.236734	0.292572	0.121221	0.0558379	-0.115513	-0.171351
0.475184	0.761745	0.539434	0.716682	0.861198	0.516512	-0.229728	1.07887	0.880895	-0.0633237	0.86474	0.506291	0.336504	0.609862	0.36577	1.59649	0.957507	1.06637	0.691508	0.286561	0.0642494	0.241498	0.386014	0.0413274	-0.222311	-0.0450627	0.0994535	-0.245233	0.177249	0.321765	-0.022922	0.144516	-0.200171	-0.344687
0.735007	0.74442	0.838866	0.48993	0.906844	0.69493	-0.0389396	1.67773	0.87619	-0.0659899	0.84961	0.785221	0.828259	1.0219	0.783098	1.08103	0.828416	2.32886	1.0977	0.00941322	0.10386	-0.245077	0.171837	-0.0400764	0.0944465	-0.25449	0.162424	-0.0494897	-0.348936	0.0679772	-0.143936	0.416914	0.205	-0.211913
0.494504	0.574785	0.693159	0.380032	0.618643	0.457954	0.0568042	1.38632	0.713406	-0.167266	0.805692	0.585465	0.596344	0.746049	0.552267	0.892498	0.660677	0.745094	0.599862	0.0802818	0.198655	-0.114471	0.124139	-0.0365493	0.118373	-0.194753	0.0438575	-0.116831	-0.313127	-0.0745159	-0.235204	0.238611	0.0779221	-0.160689
0.620285	0.675144	0.756528	0.502533	0.813506	0.680911	-0.0362905	1.51306	0.819909	-0.0989558	0.823438	0.685028	0.695056	0.911568	0.76299	1.07531	0.900047	1.52307	1.05766	0.0548598	0.136244	-0.117751	0.193221	0.0606264	0.0813839	-0.172611	0.138361	0.00576664	-0.253995	0.0569773	-0.0756173	0.310972	0.178378	-0.132595
0.67719	0.649078	0.717052	0.490679	0.816269	0.672022	-0.064707	1.4341	0.944409	-0.0285902	0.687284	0.696836	0.748109	0.901752	0.742399	1.13837	0.937201	1.39348	1.03307	-0.0281128	0.0398617	-0.186512	0.139078	-0.00516811	0.0679745	-0.158399	0.167191	0.0229446	-0.226373	0.0992165	-0.0450298	0.32559	0.181343	-0.144246
0.380704	0.540619	0.574084	0.558765	0.619452	0.714808	-0.038012	1.14817	0.663151	-0.202537	0.815227	0.4675	0.40427	0.657797	0.759056	1.07903	1.24513	0.508787	1.15721	0.159914	0.19338	0.178061	0.238748	0.334104	0.0334651	0.0181467	0.0788338	0.17419	-0.0153185	0.0453687	0.140725	0.0606872	0.156043	0.0953558
0.434246	0.499997	0.600266	0.332851	0.752256	0.543354	-0.112375	1.20053	0.723421	-0.160482	0.691156	0.510552	0.521329	0.903114	0.652319	1.2532	0.905189	0.857863	0.739633	0.0657513	0.166021	-0.101395	0.31801	0.109109	0.10027	-0.167146	0.252259	0.0433575	-0.267416	0.151989	-0.056912	0.419405	0.210504	-0.208902
0.64565	0.651636	0.703592	0.490629	0.831383	0.667861	-0.0832529	1.40718	0.917649	-0.0429439	0.710115	0.673998	0.697128	0.897669	0.72111	1.18163	0.949217	1.40716	1.02177	0.00598647	0.0579417	-0.155021	0.185733	0.0222115	0.0519553	-0.161007	0.179746	0.016225	-0.212962	0.127791	-0.0357302	0.340753	0.177232	-0.163521
0.62326	0.655414	0.71766	0.86309	0.513584	0.709315	0.165748	1.43532	0.86846	-0.0704	0.754685	0.668797	0.682453	0.562361	0.776681	0.715637	0.988371	0.606538	1.14044	0.0321541	0.0944008	0.239831	-0.109675	0.086055	0.0622467	0.207677	-0.14183	0.0539009	0.14543	-0.204076	-0.00834579	-0.349506	-0.153776	0.19573
0.50993	0.633077	0.646628	0.414275	0.584874	0.487905	0.0501449	1.29326	0.7886	-0.118193	0.802786	0.574226	0.520845	0.597393	0.498348	0.904499	0.754538	0.577911	0.644547	0.123147	0.136697	-0.0956554	0.0749435	-0.0220254	0.0135503	-0.218802	-0.0482033	-0.145172	-0.232352	-0.0617536	-0.158722	0.170599	0.07363	-0.0969689
0.359028	0.417021	0.475907	0.533382	0.537231	0.642583	-0.0605292	0.951814	0.754407	-0.139986	0.55278	0.413357	0.409724	0.613091	0.733319	1.12886	1.35023	0.265333	0.955893	0.0579937	0.116879	0.174354	0.178204	0.283555	0.0588855	0.116361	0.12021	0.225562	0.0574752	0.0613244	0.166676	0.00384922	0.109201	0.105352
0.517094	0.511952	0.62255	0.485754	0.696558	0.585216	-0.0561047	1.2451	0.830606	-0.0925346	0.61636	0.567377	0.628803	0.847038	0.711642	1.11888	0.94003	0.761714	0.823126	-0.00514185	0.105456	-0.0313392	0.179465	0.0681223	0.110598	-0.0261974	0.184607	0.0732642	-0.136796	0.0740082	-0.0373341	0.210804	0.0994615	-0.111342
0.456891	0.630681	0.695886	0.681649	0.743602	0.868414	-0.033148	1.39177	0.656559	-0.207322	0.960585	0.563865	0.504128	0.820482	0.958198	1.06857	1.24793	1.07579	1.73957	0.173791	0.238996	0.224758	0.286712	0.411524	0.0652052	0.0509675	0.112921	0.237733	-0.0142377	0.0477162	0.172528	0.0619538	0.186766	0.124812
0.357363	0.484691	0.560869	0.569149	0.620173	0.753618	-0.0502139	1.12174	0.63716	-0.221628	0.760706	0.447698	0.413528	0.717644	0.872061	1.10574	1.34366	0.488865	1.28306	0.127329	0.203506	0.211786	0.26281	0.396255	0.0761771	0.0844574	0.135482	0.268926	0.00828026	0.0593047	0.192749	0.0510245	0.184469	0.133444
0.696264	0.652777	0.719587	0.505288	0.839469	0.653902	-0.0768943	1.43917	0.967588	-0.0164727	0.674643	0.707829	0.767525	0.925387	0.720828	1.1666	0.908719	1.49454	0.984805	-0.0434873	0.0233229	-0.190976	0.143205	-0.0423617	0.0668103	-0.147489	0.186693	0.00112566	-0.214299	0.119882	-0.0656846	0.334181	0.148614	-0.185567
0.562718	0.602691	0.708053	0.475517	0.745176	0.633676	-0.025545	1.41611	0.79474	-0.114368	0.75835	0.631216	0.661091	0.875446	0.744455	1.05243	0.894956	1.11646	0.933795	0.0399734	0.145335	-0.0872007	0.182458	0.0709584	0.105362	-0.127174	0.142485	0.030985	-0.232536	0.0371228	-0.0743768	0.269659	0.158159	-0.1115
0.473508	0.600672	0.640468	0.669889	0.710153	0.820884	-0.0515947	1.28094	0.739316	-0.149877	0.81247	0.550697	0.504879	0.757202	0.875269	1.1088	1.28169	0.83634	1.53422	0.127164	0.16696	0.196381	0.236645	0.347376	0.0397958	0.0692166	0.109481	0.220212	0.0294208	0.0696849	0.180416	0.0402641	0.150995	0.110731
0.365481	0.410874	0.41416	0.554699	0.57477	0.699192	-0.162407	0.828321	0.882463	-0.0624377	0.465599	0.38906	0.368405	0.579367	0.704784	1.3878	1.68822	0.251893	1.11019	0.0453928	0.0486791	0.189218	0.209289	0.333711	0.00328626	0.143825	0.163896	0.288318	0.140538	0.160609	0.285031	0.020071	0.144493	0.124422
0.352763	0.400587	0.397644	0.552303	0.573472	0.700751	-0.181058	0.795288	0.887134	-0.0598079	0.451552	0.374532	0.350172	0.569259	0.695602	1.44218	1.76226	0.23716	1.11479	0.0478236	0.0448803	0.19954	0.220709	0.347987	-0.00294331	0.151716	0.172885	0.300164	0.15466	0.175828	0.303107	0.0211686	0.148447	0.127279
0.293312	0.512365	0.445635	0.556791	0.626984	0.739272	-0.169071	0.89127	0.658188	-0.206136	0.778448	0.361539	0.255111	0.545326	0.64299	1.40694	1.65892	0.350109	1.23501	0.219053	0.152323	0.263479	0.333672	0.445961	-0.0667299	0.0444259	0.114619	0.226907	0.111156	0.181349	0.293637	0.0701931	0.182481	0.112288
0.640826	0.485877	0.652486	0.755849	0.612116	0.691523	0.0319233	1.30497	0.98213	-0.00901581	0.494718	0.64663	0.860568	0.822013	0.92865	0.938128	1.05983	0.640678	1.08783	-0.154949	0.0116603	0.115023	-0.0287101	0.0506976	0.166609	0.269972	0.126239	0.205646	0.103363	-0.0403703	0.0390373	-0.143733	-0.0643253	0.0794076
0.391364	0.515976	0.637173	0.306922	0.509404	0.393626	0.111435	1.27435	0.61422	-0.238988	0.84005	0.499366	0.483291	0.629057	0.486085	0.799476	0.61777	0.442866	0.518007	0.124612	0.245808	-0.0844421	0.11804	0.002262	0.121197	-0.209054	-0.00657193	-0.12235	-0.33025	-0.127769	-0.243546	0.202482	0.0867041	-0.115778
0.499433	0.444454	0.608688	0.916305	0.691595	0.730554	-0.0637607	1.21738	0.820507	-0.0985951	0.541682	0.551361	0.683983	0.947153	1.00051	1.13621	1.20021	0.72047	1.20669	-0.0549792	0.109255	0.416873	0.192162	0.231121	0.164234	0.471852	0.247141	0.2861	0.307617	0.0829069	0.121866	-0.22471	-0.185752	0.0389588
0.449	0.524754	0.651811	0.348944	0.719867	0.535569	-0.0496147	1.30362	0.68885	-0.184238	0.761783	0.540984	0.557715	0.894165	0.665245	1.10441	0.821663	0.889373	0.725256	0.0757543	0.202811	-0.100056	0.270867	0.0865694	0.127057	-0.17581	0.195112	0.0108151	-0.302867	0.0680554	-0.116242	0.370923	0.186625	-0.184297
0.476275	0.595182	0.558507	0.69218	0.788185	0.655835	-0.170549	1.11701	0.852765	-0.0794678	0.697944	0.515755	0.446927	0.739617	0.615423	1.41123	1.17426	0.870797	0.989836	0.118907	0.0822319	0.215905	0.311909	0.17956	-0.0366751	0.0969977	0.193002	0.060653	0.133673	0.229677	0.0973281	0.0960044	-0.0363448	-0.132349
0.530155	0.616976	0.559824	0.712002	0.806274	0.693538	-0.180405	1.11965	0.947003	-0.0272199	0.651504	0.544787	0.481045	0.731587	0.629294	1.44023	1.23885	0.928296	1.09365	0.086821	0.0296691	0.181847	0.27612	0.163383	-0.0571519	0.0950264	0.189299	0.0765618	0.152178	0.246451	0.133714	0.0942721	-0.0184647	-0.112737
0.63184	0.45437	0.660026	0.807668	0.616202	0.806752	0.0343392	1.32005	0.957296	-0.021818	0.474639	0.645779	0.917822	0.895105	1.1719	0.933602	1.2223	0.664778	1.47776	-0.17747	0.0281859	0.175827	-0.0156387	0.174911	0.205656	0.353297	0.161831	0.352381	0.147641	-0.0438247	0.146725	-0.191466	-0.000916067	0.19055
0.610504	0.430439	0.605018	0.740511	0.600495	0.664906	0.00375253	1.21004	1.00907	0.00451318	0.426571	0.607755	0.858116	0.844047	0.934582	0.992523	1.09898	0.528007	1.01382	-0.180066	-0.00548587	0.130007	-0.0100096	0.0544013	0.17458	0.310073	0.170056	0.234467	0.135493	-0.00452372	0.0598872	-0.140017	-0.075606	0.0644109
0.286862	0.364552	0.493143	0.401051	0.538248	0.573024	-0.0437317	0.986287	0.5817	-0.264462	0.626701	0.376117	0.388048	0.728108	0.775151	1.09146	1.16198	0.283984	0.797702	0.0776906	0.206282	0.11419	0.251386	0.286162	0.128591	0.0364991	0.173696	0.208472	-0.092092	0.0451045	0.0798804	0.137196	0.171972	0.0347759
0.566569	0.383232	0.575173	0.637761	0.519118	0.671058	0.0512251	1.15035	0.98504	-0.00753629	0.389052	0.570855	0.850333	0.779117	1.00716	0.902542	1.16671	0.360369	1.03044	-0.183336	0.0086045	0.0711921	-0.0474506	0.104489	0.191941	0.254529	0.135886	0.287826	0.0625876	-0.0560551	0.0958848	-0.118643	0.0332972	0.15194
0.369425	0.284865	0.442135	0.606689	0.468025	0.552165	-0.028446	0.88427	0.835548	-0.0895928	0.340932	0.404148	0.573379	0.726416	0.857008	1.05856	1.24886	0.171836	0.756329	-0.08456	0.0727099	0.237264	0.0986004	0.182741	0.15727	0.321824	0.18316	0.267301	0.164554	0.0258904	0.110031	-0.138664	-0.0545237	0.0841402
0.484856	0.360761	0.488409	0.673662	0.530146	0.584251	-0.0409771	0.976818	0.992726	-0.00365031	0.363404	0.486629	0.656413	0.717728	0.790976	1.08546	1.19623	0.269982	0.821079	-0.124095	0.00355272	0.188806	0.0452902	0.0993945	0.127648	0.312902	0.169386	0.22349	0.185254	0.0417375	0.0958418	-0.143516	-0.0894118	0.0541043
0.534357	0.548075	0.619255	0.395977	0.727989	0.600543	-0.080709	1.23851	0.862903	-0.0735931	0.635152	0.575242	0.603756	0.822536	0.678537	1.17559	0.969783	0.834382	0.856434	0.0137177	0.0848978	-0.13838	0.193633	0.066186	0.0711802	-0.152097	0.179915	0.0524683	-0.223277	0.108735	-0.0187118	0.332012	0.204566	-0.127447
0.400839	0.477716	0.379727	0.676041	0.677975	0.865361	-0.281977	0.759454	1.0556	0.0270469	0.452555	0.39014	0.318619	0.538909	0.687859	1.78543	2.2789	0.364626	1.72564	0.0768768	-0.0211119	0.275202	0.277136	0.464522	-0.0979887	0.198325	0.200259	0.387645	0.296314	0.298248	0.485634	0.00193384	0.18932	0.187386
0.44001	0.499165	0.446961	0.76996	0.746451	0.990731	-0.250953	0.893922	0.984449	-0.00783664	0.50705	0.443472	0.393993	0.668386	0.887119	1.67006	2.2166	0.572993	2.39115	0.0591545	0.00695087	0.32995	0.306441	0.550721	-0.0522036	0.270796	0.247286	0.491567	0.322999	0.29949	0.54377	-0.0235094	0.220771	0.244281
0.321086	0.380784	0.459597	0.499666	0.500241	0.642822	-0.0423444	0.919194	0.698625	-0.177423	0.545047	0.384149	0.387543	0.603779	0.775872	1.08843	1.39866	0.212955	0.956495	0.0596976	0.138511	0.17858	0.179155	0.321736	0.0788135	0.118882	0.119457	0.262039	0.0400684	0.0406438	0.183225	0.000575367	0.143157	0.142581
0.510997	0.541802	0.585939	0.683932	0.376966	0.530616	0.217023	1.17188	0.8721	-0.068319	0.621261	0.547186	0.552624	0.407675	0.573842	0.643355	0.905583	0.23564	0.716289	0.030805	0.0749415	0.172935	-0.134031	0.0196192	0.0441365	0.14213	-0.164836	-0.0111859	0.0979931	-0.208972	-0.0553224	-0.306965	-0.153315	0.15365
0.406551	0.487213	0.558595	0.39366	0.269071	0.335067	0.349808	1.11719	0.727811	-0.157534	0.669422	0.476548	0.466116	0.308493	0.384158	0.481693	0.599838	0.147784	0.458403	0.0806614	0.152043	-0.0128915	-0.13748	-0.0714848	0.0713821	-0.0935529	-0.218142	-0.152146	-0.164935	-0.289524	-0.223528	-0.124589	-0.0585933	0.0659957
0.344966	0.41007	0.460728	0.543721	0.526979	0.664833	-0.0670761	0.921455	0.748742	-0.143679	0.547679	0.398667	0.387581	0.592079	0.746962	1.1438	1.44301	0.240078	1.01362	0.0651042	0.115761	0.198755	0.182013	0.319866	0.0506573	0.133651	0.116909	0.254762	0.0829935	0.0662516	0.204105	-0.0167419	0.121111	0.137853
0.591823	0.548731	0.624405	0.775352	0.482555	0.613315	0.128144	1.24881	0.947819	-0.0267892	0.57894	0.607896	0.67344	0.549103	0.697896	0.772824	0.98224	0.387806	0.88537	-0.0430922	0.0325818	0.183529	-0.109268	0.0214923	0.075674	0.226622	-0.0661758	0.0645846	0.150948	-0.14185	-0.0110894	-0.292797	-0.162037	0.13076
0.308962	0.414453	0.468813	0.538709	0.477615	0.604845	-0.00930026	0.937627	0.65903	-0.205523	0.628883	0.380586	0.349486	0.54026	0.684177	1.01878	1.29016	0.200616	0.866059	0.105491	0.159851	0.229746	0.168653	0.295883	0.05436	0.124255	0.063162	0.190392	0.0698953	0.00880203	0.136032	-0.0610933	0.0661367	0.12723
0.378065	0.510281	0.445356	0.694012	0.658691	0.89774	-0.19323	0.890712	0.848906	-0.0817209	0.601105	0.410334	0.329962	0.574883	0.783516	1.47902	2.01578	0.399697	1.87888	0.132216	0.0672908	0.315946	0.280626	0.519675	-0.0649254	0.18373	0.148409	0.387458	0.248656	0.213335	0.452384	-0.0353207	0.203728	0.239049
0.231225	0.293961	0.347847	0.340682	0.321172	0.409858	0.0398727	0.695695	0.66473	-0.201396	0.442227	0.283603	0.27361	0.380046	0.484989	0.923312	1.17827	0.0502428	0.53695	0.0627367	0.116623	0.109457	0.0899471	0.178633	0.053886	0.0467201	0.0272104	0.115896	-0.00716588	-0.0266756	0.0620102	-0.0195097	0.0691761	0.0886858
0.345158	0.351435	0.368136	0.535315	0.508369	0.677834	-0.159991	0.736272	0.937584	-0.0322134	0.374831	0.356462	0.361561	0.532527	0.710046	1.38093	1.84126	0.155207	1.04908	0.00627701	0.0229777	0.190156	0.163211	0.332676	0.0167007	0.183879	0.156934	0.326399	0.167179	0.140233	0.309699	-0.0269459	0.14252	0.169466
0.361652	0.41084	0.514423	0.549344	0.33196	0.455221	0.21558	1.02885	0.703025	-0.174381	0.584389	0.431326	0.452833	0.415655	0.569993	0.645305	0.884915	0.140496	0.596001	0.0491881	0.152771	0.187692	-0.0296924	0.0935686	0.103583	0.138504	-0.0788805	0.0443804	0.0349212	-0.182463	-0.0592023	-0.217384	-0.0941235	0.123261
0.501954	0.5024	0.587764	0.576922	0.517922	0.557841	0.0631655	1.17553	0.854007	-0.0787447	0.588286	0.543167	0.587241	0.605923	0.652625	0.881175	0.949091	0.37664	0.767327	0.000446345	0.0858095	0.0749681	0.0159682	0.0558873	0.0853631	0.0745218	0.0155219	0.0554409	-0.0108414	-0.0698412	-0.0299222	-0.0589999	-0.0190809	0.039919
0.601611	0.383988	0.434834	0.822041	0.595741	0.981327	-0.156134	0.869667	1.38354	0.160913	0.277539	0.511469	0.681274	0.674627	1.11127	1.37004	2.25679	0.295923	2.33414	-0.217624	-0.166777	0.22043	-0.0058698	0.379716	0.050846	0.438053	0.211754	0.597339	0.387207	0.160908	0.546493	-0.226299	0.159286	0.385586
0.414507	0.299858	0.355366	0.40515	0.370473	0.550169	-0.0208134	0.710732	1.16642	0.0768194	0.257075	0.383799	0.491239	0.439054	0.652014	1.04251	1.54817	0.0694511	0.752506	-0.11465	-0.0591412	-0.00935748	-0.044034	0.135662	0.0555084	0.105292	0.0706156	0.250311	0.0497837	0.0151072	0.194803	-0.0346765	0.145019	0.179696
0.391697	0.445615	0.48032	0.546311	0.334567	0.474279	0.178863	0.960639	0.815493	-0.101629	0.546436	0.433751	0.422203	0.360623	0.511216	0.69655	0.987423	0.117403	0.623667	0.0539174	0.0886223	0.154614	-0.0571308	0.0825815	0.0347049	0.100696	-0.111048	0.0286641	0.0659915	-0.145753	-0.00604075	-0.211745	-0.0720322	0.139712
0.406867	0.476103	0.575682	0.493832	0.339192	0.398636	0.258494	1.15136	0.706757	-0.171813	0.673646	0.483969	0.491964	0.410135	0.482012	0.589201	0.692459	0.199327	0.523736	0.0692368	0.168815	0.0869649	-0.0676747	-0.00823062	0.0995781	0.0177281	-0.136912	-0.0774674	-0.0818499	-0.23649	-0.177045	-0.15464	-0.0951955	0.0594441
0.365043	0.558645	0.420863	0.564478	0.506105	0.45101	-0.091957	0.841727	0.867368	-0.0710262	0.644069	0.391961	0.275011	0.381281	0.339775	1.20254	1.07163	0.187721	0.590123	0.193601	0.05582	0.199434	0.141061	0.0859663	-0.137781	0.00583319	-0.0525402	-0.107635	0.143614	0.0852411	0.0301464	-0.0583734	-0.113468	-0.0550948
0.290226	0.390496	0.376223	0.631071	0.503448	0.734187	-0.144628	0.752446	0.771419	-0.129038	0.506204	0.330438	0.279618	0.485047	0.707352	1.33816	1.95147	0.156028	1.21841	0.10027	0.0859973	0.340846	0.213222	0.443961	-0.0142725	0.240576	0.112953	0.343691	0.254848	0.127225	0.357964	-0.127623	0.103115	0.230739
0.244157	0.170795	0.27438	0.39329	0.27222	0.418907	0.00395155	0.54876	0.889852	-0.058284	0.191937	0.258828	0.392235	0.437317	0.672967	0.992128	1.52674	0.0223168	0.547997	-0.0733621	0.0302224	0.149133	0.0280625	0.17475	0.103585	0.222495	0.101425	0.248112	0.11891	-0.00215991	0.144527	-0.12107	0.0256169	0.146687
0.343064	0.467787	0.346768	0.568631	0.644999	0.430742	-0.300707	0.693535	0.98932	-0.00536869	0.472837	0.344911	0.254311	0.478133	0.319306	1.86003	1.24216	0.287587	0.562986	0.124723	0.00370349	0.225567	0.301935	0.0876779	-0.12102	0.100843	0.177212	-0.0370455	0.221863	0.298232	0.0839744	0.0763684	-0.137889	-0.214257
0.373352	0.288767	0.398736	0.5286	0.350666	0.518647	0.0641435	0.797471	0.936338	-0.0328773	0.3084	0.385835	0.515533	0.484208	0.71616	0.879446	1.30073	0.0794998	0.695189	-0.0845849	0.0253841	0.155248	-0.0226852	0.145296	0.109969	0.239833	0.0618998	0.22988	0.129864	-0.0480693	0.119911	-0.177934	-0.00995288	0.167981
0.150729	0.286192	0.312841	0.357383	0.276993	0.401501	0.0607767	0.625682	0.481807	-0.349703	0.593997	0.21715	0.164764	0.302785	0.438887	0.885411	1.2834	0.0304832	0.527059	0.135463	0.162112	0.206654	0.126264	0.250772	0.0266491	0.0711912	-0.00919906	0.115309	0.0445422	-0.0358481	0.0886602	-0.0803903	0.044118	0.124508
